# Supplementary material for: UAV Trajectory Planning based on Improved Whale Optimization Algorithmm
Source: Research Square preprint supplement (doi:10.21203/rs.3.rs-4952079/v1), 2024-09-24
Supplement: Supplementary file 1 [file 41776238b5e2e52aade4be3e.docx]

Start
